1 **How early family activities predict life satisfaction among parents with adult children**

2 M. Nils Peterson<sup>1\*</sup>, Kathleen Bordewieck<sup>2</sup>, Elijah Velluti-Fry<sup>1</sup>, Julia L. Jansson<sup>3</sup>, Gwen E.

3 Peterson<sup>1</sup>, Tarla R. Peterson<sup>1</sup>

4

5 <sup>1</sup> Fisheries, Wildlife and Conservation Biology Program, Department of Forestry and

6 Environmental Resources, North Carolina State University, Raleigh, NC, United States

7 <sup>2</sup> Department of STEM Education, North Carolina State University, Raleigh, NC, United States

8 <sup>3</sup> Department of Wildlife, Fish, and Environmental Studies, Swedish University of Agricultural

9 Sciences, Umeå, Sweden

10

11 \*Corresponding author. Campus Box 8008, Raleigh, NC 27695-8008 USA.

12 [nils\\_peterson@ncsu.edu](mailto:nils_peterson@ncsu.edu)

13

14 **Abstract:** Life satisfaction represents a relatively universal social goal. Research suggests  
15 familiar interactions of diverse types may shape life satisfaction, but many questions remain  
16 about the valence and relative importance of variables shaping life satisfaction. In this  
17 exploratory study, we examined the relationships between frequency of shared parent-child  
18 activities in early life stages and self-reported parental life-satisfaction after children leave home  
19 using a case study of NC State University and University of Texas at El Paso students' parents  
20 (n=92). Frequency of shared housework with young children was the most important, and  
21 positive, predictor of life satisfaction among parents after the children left home, and shared  
22 religious activities were also a positive predictor. Conversely, frequency of playing sports with  
23 young children was a negative predictor of later life satisfaction among parents. We did not  
24 detect a relationship for shared visits to local parks. Current activity level and income level both  
25 positively predicted life satisfaction, but we did not detect relationships for gender or marital  
26 status. This preliminary research highlights several novel ways shared family activities may  
27 affect later life satisfaction among older parents, but requires larger scale research to assess if an  
28 how findings apply in other contexts.

29

30 **Keywords:** aging, family, happiness, recreation, well-being

31

32

### 33 **Introduction**

34           Global scale social and environmental challenges (e.g., climate change, disease, war)  
35 threaten human well-being worldwide and highlight the need for research factors that contribute  
36 to resilience and happiness (Myers and Patz, 2009; Beal et al., 2022). Well-being, however, is a  
37 complex concept shaped by social conditions (e.g., availability of education, food, housing,  
38 healthcare [Human Development Index]), self-realization (i.e., eudaimonic approaches),  
39 individual participation in practices associated with quality of life (e.g., exercise, healthy diets,  
40 education; Veenhoven, 1996), and people feeling well (Ruggeri et al., 2020). The concept is  
41 further complicated by intersubjectivity with experts assessing well-being for other people and  
42 individuals assessing their own well-being (i.e., subjective well-being; Snizek et al., 2010). The  
43 latter division is often paired with different metrics of well-being where medical or economic  
44 data informs external assessments of well-being and survey data informs subjective well-being.  
45 Subjective well-being also includes temporal elements, with some measures (e.g., life  
46 satisfaction) ranging from an assessment of the current moment to a subject's entire life  
47 (Veenhoven, 1996). Composite measures of well-being can be used to integrate some aspects of  
48 well-being, but 10 or more dimensions ranging from resilience to self-esteem may be needed to  
49 capture psychological well-being (Huppert and So, 2013; Rugeri et al., 2020).

50           Understanding the predictors of well-being appears worth the considerable effort required  
51 given well-being predicts a host of positive outcomes in addition to simply feeling well. For  
52 instance, well-being predicts increased workplace productivity, learning efficacy, creativity,  
53 collaboration, volunteerism, relationship quality, national economic performance, and physical  
54 health measures for individuals and nations (Deaton, 2008; Diener, 2012; Taris, 2018; Oishi,  
55 2007). The drivers of well-being are complex, diverse, and differ based on context. Age exhibits

56 non-linear relationships with life satisfaction, increasing until middle age, and then declining  
57 toward the end of life (Gerstorf et al., 2010). Well-being may be more resilient to the presence of  
58 illness among older people than younger people (Harrison et al., 2016). Income tends to relate  
59 positively with life satisfaction (Diener et. al., 2002), but both income inequality and national  
60 context can mediate the relationship (Harrison et al., 2016).

61         The relationship between employment and well-being illustrates the difficulty in  
62 determining causality, with students reporting the lowest well-being, retired people reporting the  
63 highest levels of well-being, and both employed and unemployed people reporting intermediate  
64 levels (Harrison et al., 2016). In addition to struggling with low well-being levels, students may  
65 be particularly vulnerable to declines in well-being after a disturbance (Jackson et al., 2021;  
66 Liverpool et al., 2023; Sheldon et al., 2021). Gender effects on well-being may have flipped  
67 between 1970 and 2000, with women shifting from higher to lower well-being than men during  
68 the period (Stevenson and Wolfers, 2009), and this trend may be exacerbated by large scale  
69 disturbances (e.g., COVID-19) that differentially affect women due to higher family  
70 responsibilities and loneliness (Etheridge and Spantig, 2022). Physical health and activity are  
71 among the strongest and most consistent predictors of well-being and life satisfaction (Fastame,  
72 2021; Schmiedeberg and Schröder, 2017). All these effects may vary by nation and cultural  
73 context, with Nordic nations, especially Finland and Denmark, frequently ranking at the top of  
74 well-being and happiness scales (Helliwell et al., 2024; Harrison et. al., 2016). These national  
75 differences may in part reflect lower social inequality supporting both higher levels of subjective  
76 well-being and more resilient well-being.

77         Social and familial relationships clearly shape life satisfaction influencing both parents  
78 and children. Social network size and having more kin within social networks appear to drive

79 higher life satisfaction if familial relationships are positive (Fuller-Iglesaias, et al., 2015). Shared  
80 family activities can shape well-being for both children and parents with shared meals and  
81 leisure typically increasing well-being and shared homework and housework decreasing well-  
82 being (Offer, 2013; Coyl-Sheperd and Hanlon, 2013; Offer, 2014). These relationships may  
83 persist into late life with overall life satisfaction positively related to satisfaction with family  
84 relationships, social leisure time, and religious well-being (Fastame, 2021; Schmiedeberg and  
85 Schröder, 2017). Contributions to life satisfaction from social interactions may reflect the human  
86 need for affiliation (La Guardia and Patrick, 2008).

87 We build on this research using a retrospective study to better understand how leisure and  
88 work activities that parents share with children may predict life satisfaction of parents later in  
89 life. We test the hypothesis that more frequent shared activities in four domains (household tasks,  
90 sports, religious activities, and visiting local parks) predict life satisfaction among parents of  
91 adult children, while controlling for income and current physical activity levels. We  
92 acknowledge that life satisfaction is clearly only one element of well-being, but an important one  
93 (Ruggeri et al., 2020). The concept hearkens back to the seminal question of how we can foster  
94 what humans consider a life well lived (Veenhoven, 1996; Diener et al., 2002). The four domains  
95 for shared activities we address are grounded in self-determination theory which posits humans  
96 have three fundamental psychological needs: autonomy (self-rule or sense of control),  
97 competence (being challenged in but also masterful in activities), and relatedness (needing  
98 interpersonal bonds; La Guardia and Patrick, 2008; Deci and Ryan, 2012). Each of the four  
99 shared activity domains may contribute to the need for relatedness by their nature of being  
100 shared and potentially building long term familiar bonds (Newman et al., 2014; Schmiedeberg  
101 and Schröder, 2017; Lim and Putnam, 2010). Household tasks, sports, and religious activities

102 may also relate to competence and autonomy given they aim to achieve goals, and often build  
103 competence in some skills. Religious activities may influence life satisfaction by reducing  
104 uncertainty about identity and increasing personal sense of control (autonomy; Hayward and  
105 Elliott, 2014).

## 106 **Methods**

107 A convenience sample was used to survey parents who had children in college. Parent  
108 emails were requested from students in a Human Dimensions of Wildlife Management class at  
109 North Carolina State University (n = 78 students) and a Methods of Research in Communication  
110 Studies class at The University of Texas at El Paso (n = 38). Students randomly selected one of  
111 their parents to invite to participate. A parent of all 78 North Carolina State University students  
112 participated, and a parent of 14 students at the University of Texas at El Paso participated  
113 (31.58% participation rate). Data were collected via an online survey on the Qualtrics platform  
114 (Qualtrics, Provo, UT). Each individual was given a unique survey link, which was open  
115 between March 28<sup>th</sup> and April 18<sup>th</sup>, 2018. The initial email was sent on March 28<sup>th</sup>, 2018, and  
116 participants received a follow-up reminder email on April 4<sup>th</sup> and April 11<sup>th</sup> of 2018.

117 Life satisfaction was measured using Diener et al.'s (1985) five-item Satisfaction with  
118 Life Scale with each item ranging from "strongly disagree" (1) to "strongly agree" (7) (Table 1).  
119 This yielded a scale with a minimum of 5 and a maximum of 35. The frequency of parent-child  
120 activities (play sports outside with my children, work on household tasks [inside and outside]  
121 with my children, participate in religious activities with my children, visit local parks with my  
122 children) was measured on a five-point scale ranging from "never" (1) to "once a week or more"  
123 (5). All respondents were asked to indicate their age, marital status (converted to a dummy  
124 variable for married or not), gender (female, male, or other), current state of residence, age range

125 of their children, highest education level achieved (less than high school, high school/GED,  
126 vocational or trade school, associate's degree, bachelor's degree, graduate or professional  
127 degree), self-identified ethnicity, and annual household income (Less than \$25,000; \$25,000 -  
128 \$50,000; \$50,001-\$75,000; \$75,001-100,000; \$100,001-\$125,000; \$125,001-\$150,000; Greater  
129 than \$150,001), and current activity level (how many days from the last 7 in which they walked  
130 for at least 10 minutes at a time). The instrument was pretested by undergraduate volunteers (n =  
131 67) at North Carolina State University. We also conducted cognitive interviews with a  
132 convenience sample of non-student adults and discussed each question to understand how  
133 interviewees perceived and interpreted questions and to identify and correct any wording or  
134 comprehension issues (n = 9; Drennan, 2003).

135 We modeled how frequency of participation in each of the family activities predicted life  
136 satisfaction among parents with adult children using ordinary least squares regression. The  
137 model predicted the Satisfaction with Life Scale (Diener et al., 1985) using 9 independent  
138 variables (Table 2). We capped the model at 9 predictors given the evidence that  $n = 8-10$  is  
139 required per variable for a robust regression model (Gotelli and Ellison, 2004; Jenkins and  
140 Quintana-Ascencio, 2020). We calculated variance inflation factors (VIFs), and scores were  $\leq$   
141 1.53 for all variables suggesting multicollinearity problems were unlikely. We calculated the  
142 least significant number (LSN) of observations required to create significant test results at alpha  
143 0.05 for each variable to highlight where future research with larger sample sizes may find  
144 effects not detected in this study. We report partial Eta Squared ( $\eta_p^2$ ) values for each independent  
145 variable to assess effect size and adopt the Miles and Shevlin (2001) rules of thumb for small  
146 ( $\eta_p^2 \geq 0.02$ ), medium ( $\eta_p^2 \geq 0.13$ ), and large ( $\eta_p^2 \geq 0.26$ ) effect sizes in regression. All analyses  
147 were conducted using JMP Pro 17. The research was conducted according to the principles in the

148 Declaration of Helsinki, and approved and ruled exempt by the North Carolina State University  
149 Institutional Review Board (Protocol Number 12531). Informed consent was obtained by  
150 participants checking a box on the survey indicating they had read the informed consent content  
151 and agreed to participate. Signatures were not collected because they would have created the  
152 only link to participants in otherwise anonymous data.

## 153 **Results**

154 A total of 92 parents of college-age children participated in the study. Of those, 56  
155 resided in North Carolina, 8 chose not to share where they lived, 5 each resided in California and  
156 Texas, 4 reported currently living outside of the United States, 3 resided in Massachusetts, 2 each  
157 resided in New Jersey, Ohio, and Virginia, and 1 each resided in Maryland, Minnesota, New  
158 York, South Carolina, and Nevada. Most respondents reported being married (86%), and most  
159 reported being female (female = 64%, male 36%). Average age was 54.23 (SD = 6.59). Average  
160 household income before taxes (4.82, SD = 1.63) corresponded to slightly over \$100,000.  
161 Average level of formal education was 4.87 (SD = 1.26), corresponding to a bachelor's degree.  
162 Participants reported having on average 2.52 (SD = 1.10) children, with the oldest child of  
163 respondents averaging 25.70 (SD = 6.94) years old and the youngest child averaging 20.45 (SD  
164 = 7.53) years old. Most participants self-identified as White (83%) followed by Hispanic (11%),  
165 and Black (2%).

166 Exploratory factor analysis suggests the five Satisfaction with Life Scale items grouped  
167 onto one factor (Eigenvalue = 11.638 [all remaining values  $\leq 0.258$ ]) explaining 57.1% of  
168 variance and displaying high internal reliability and acceptable factor loadings for each item  
169 (Table 1). Mean satisfaction with life (24.83) corresponded with one unit above neutral or  
170 choosing 'slightly agree' for items in the scale (Table 1). The model (Table 2) had acceptable



171 predictive capacity (adjusted  $R^2 = 0.45$ ,  $n = 91$ ). How often parents shared household tasks with  
172 their children during childhood ( $\eta_p^2 = 0.10$ ) and parents' current physical activity levels ( $\eta_p^2 =$   
173  $0.13$ ) were the strongest predictors of participants' life satisfaction. Both were positive predictors  
174 with moderately large effect size (Table 2). The frequency of playing sports outside with  
175 children predicted lower life satisfaction, but the effect size was almost half that of completing  
176 household tasks, and relatively low ( $\eta_p^2 = 0.04$ ; Table 2). Shared religious activities with children  
177 during their childhood years was a positive predictor of life satisfaction, but also less important  
178 than shared household tasks and had a small effect size ( $\eta_p^2 = 0.05$ ). We did not detect effects for  
179 frequency of visiting local parks with children, and the LSN 0.05 suggests a relatively small  
180 sample size of 200 would have allowed detecting a positive effect (Table 2). Household income  
181 was positively associated with life satisfaction (Table 2). Age and unmarried status had negative  
182 coefficients with effect sizes detectable with reasonably small sample sizes ( $n < 300$ ), but there  
183 was little evidence for a gender effect (Table 2).

## 184 **Discussion**

185 Several factors may help explain why sharing household tasks with children was the  
186 strongest predictor of life satisfaction among parents after those children had gone to college.  
187 Household tasks occur regularly, perhaps daily, and thus may be more conducive to building  
188 long term familial bonds, and thus relatedness, than shared activities that are less common, as  
189 would be the case for nearly all leisure activities (Schmiedeberg and Schröder, 2017). Similarly,  
190 shared household tasks may render children more competent in household work, and provide  
191 parents, particularly mothers, more autonomy (Tomanovic, 2003). Further, shouldering too much  
192 household work as an individual renders outside employment less beneficial to having a sense of  
193 control (Ross and Mirowsky, 1992), so sharing household tasks with children may help parents

194 feel more in control than they would otherwise. We are aware that most research in this domain  
195 suggests well-being and life satisfaction suffer from too much household work and imbalances in  
196 division of household tasks (e.g., González, et al., 2023; Ahn and Yoo, 2022; Carlson et al.,  
197 2020; Owoo and Lambon-Queyefio, 2021; Peristera et al., 2018). We, however, note that this  
198 relationship is nuanced. Housework can contribute to happiness through goal satisfaction and  
199 activity enjoyment, for example, when tasks align with key personal characteristics and activity  
200 preferences (Lee and Tang, 2022). Some research suggests unpaid housework may negatively  
201 impact women’s mental health with limited effects for men (Leopold, 2019; Ervin et al., 2022).  
202 It seems reasonable that enjoyable and shared household tasks may have positive impacts on  
203 long term life satisfaction for parents. Given satisfaction with housework can be a primary  
204 contributor to overall life satisfaction (Pagan, 2020), our results suggest that additional research  
205 exploring *how* shared housework among parents and children may contribute to their life  
206 satisfaction is warranted.

207         Given religious activity has long been among the most important predictors of life  
208 satisfaction in nations where religion is widely practiced (Domínguez and López-Noval, 2021;  
209 Hayward and Elliott, 2014; Sholihin et al., 2022), it is perhaps not surprising that frequency of  
210 shared religious activities between parents and children also predicted parental life satisfaction  
211 after children leave the home. This intuitive yet novel finding may also relate to self-  
212 determination theory. Specifically, religious activities may influence life satisfaction by reducing  
213 uncertainty about identity and increasing personal sense of control (i.e., autonomy; Hayward and  
214 Elliott, 2014), and these dynamics may have more influence on long term life satisfaction among  
215 parents when shared with adult children. The tendency for individual religious observance to  
216 promote health and well-being enhancing behaviors, including reduced cigarette and alcohol

217 consumption and increased compliance with medical directives (Deaton and Stone, 2013;  
218 Hayward and Elliott, 2014), may also occur when religious observance is shared between parents  
219 and children. Future research with larger and more diverse samples would be needed to  
220 disentangle the contributions of individual observance and household level observance.

221         We were surprised by the frequency of shared sports activities with children predicting  
222 lower life satisfaction among parents after their children went to college, given generally positive  
223 associations between leisure and various forms of subjective well-being. Newman et al. (2014)  
224 suggested leisure research indicated these positive associations were mediated by affiliation (e.g.,  
225 building social ties), autonomy (e.g., maintaining a leisure activity as one ages), detachment  
226 (e.g., escaping from pressure filled activities), meaning (e.g., providing purpose in life), and  
227 mastery (e.g., experiencing high skill). Playing sports with children may fail to generate life  
228 satisfaction through these mechanisms for multiple reasons. First, it may decrease the time  
229 available to create emotionally rewarding relationships outside the family (e.g., leisure well-  
230 being model; Carruthers and Hood, 2007) for parents where participation in other leisure  
231 activities including league sports might increase such social ties (Kim et al., 2020). Similarly,  
232 playing sports with children often involves sports of interest to the child, and can thus run  
233 counter to life enjoyment emerging from spontaneously following an inner interest for the  
234 parents (Newman et al., 2014). Finally, playing sports with children seems an unlikely path to  
235 developing high skill or mastery in a sport for most parents.

236         Small sample size may explain our failure to detect a positive relationship between  
237 visiting local parks with children and life satisfaction among parents after children went to  
238 college (i.e.,  $n = 200$  would have detected such a relationship). The relationship between time  
239 and nature and various forms of well-being is also complex, and questions remain about the

240 duration of effects, dosage levels required to create an effect, and differential effects from  
241 different types of parks and activities within them (Beall et al., 2022; Peterson et al., 2024). The  
242 demographic control variables exhibited patterns lending face validity to the study since they  
243 largely reflect the extant literature. Specifically, current activity levels and income levels tend to  
244 be positive predictors of well-being and life satisfaction (Deaton, 2008; Deiner et al. 2002;  
245 Fastame, 2021), whereas age and marital status have less clear and mixed effects (Bartram, 2021;  
246 Deiner et al., 2002).

247 Future research is needed to address several limitations of this study. Larger studies  
248 would be able to detect more socially meaningful relationships and assess the potential for  
249 cultural, geographic, and economic variables to moderate relationships between parent-child  
250 activities and later life satisfaction among parents. Panel studies are needed to avoid recall bias  
251 associated with the retrospective pretest methods used in this study. Finally, research with more  
252 diverse populations is needed to understand how shared household tasks shape life satisfaction in  
253 contexts where those tasks are more likely to encroach on leisure and education. Despite these  
254 limitations, this study contributes to life satisfaction literature by documenting the intriguing  
255 possibility that several shared family activities, including shared household work, can shape long  
256 term life satisfaction.

## 257 **Acknowledgements**

258 We would like to thank the families who participated in this study for volunteering their time.  
259 This research did not receive any specific grant from funding agencies in the public, commercial,  
260 or not-for-profit sectors.

## 261 **Literature Cited**

- 262 Ahn, J., & Yoo, J. P. (2022). Patterns of time use among 12-year-old children and their life  
263 satisfaction: A gender and cross-country comparison. *Child Indicators Research*, *15*(5),  
264 1693-1717.
- 265 Bartram, D. (2021). Age and life satisfaction: Getting control variables under control. *Sociology*,  
266 *55*(2), 421-437.
- 267 Beall, J. M., Jackson, S. B., Casola, W. R., Peterson, M. N., Larson, L. R., Stevenson, K. T., &  
268 Seekamp, E. (2022). Self-reported participation in outdoor and nature-based recreation  
269 before and during the COVID-19 pandemic supports psychological health and well-  
270 being. *Wellbeing, Space and Society*, *3*, 100094.
- 271 Carlson, D. L., Miller, A. J., & Rudd, S. (2020). Division of housework, communication, and  
272 couples' relationship satisfaction. *Socius*, *6*, 2378023120924805.
- 273 Carruthers, C., & Hood, C. (2007). Building a life of meaning through therapeutic recreation:  
274 The leisure and well-being model, part I. *Therapeutic Recreation Journal*, *41*(4), 276–  
275 297.
- 276 Coyl-Shepherd, D. D., & Hanlon, C. (2013). Family play and leisure activities: Correlates of  
277 parents' and children's socio-emotional well-being. *International Journal of Play*, *2*(3),  
278 254-272.
- 279 Deaton, A. (2008). Income, health, and well-being around the world: Evidence from the Gallup  
280 World Poll. *Journal of Economic perspectives*, *22*(2), 53-72.
- 281 Deaton, A., & Stone, A. A. (2013). Two happiness puzzles. *American Economic Review*, *103*(3),  
282 591-597.
- 283 Deci, E. L., & Ryan, R. M. (2012). Self-determination theory. *Handbook of theories of social*  
284 *psychology*, *1*(20), 416-436.

- 285 Diener, E. (2012). New findings and future directions for subjective well-being research.  
286 *American psychologist*, 67(8), 590.
- 287 Diener, E., Lucas, R. E., & Oishi, S. (2002). Subjective well-being: The science of happiness and  
288 life satisfaction. *Handbook of positive psychology*, 2, 63-73.
- 289 Domínguez, R., & López-Noval, B. (2021). Religiosity and life satisfaction across countries:  
290 New insights from the self-determination theory. *Journal of Happiness Studies*, 22(3),  
291 1165-1188.
- 292 Drennan, J. (2003). Cognitive interviewing: Verbal data in the design and pretesting of  
293 questionnaires. *Journal of Advanced Nursing*, 42(1), 57–63.
- 294 Ervin, J., Taouk, Y., Alfonzo, L. F., Hewitt, B., & King, T. (2022). Gender differences in the  
295 association between unpaid labour and mental health in employed adults: A systematic  
296 review. *The Lancet Public Health*, 7(9), e775-e786.
- 297 Etheridge, B., & Spantig, L. (2022). The gender gap in mental well-being at the onset of the  
298 Covid-19 pandemic: Evidence from the UK. *European Economic Review*, 145, 104114.
- 299 Fastame, M. C. (2021). Life satisfaction in late adult span: the contribution of family  
300 relationships, health self-perception and physical activity. *Aging Clinical and*  
301 *Experimental Research*, 33, 1693-1698.
- 302 Fuller-Iglesias, H. R., Webster, N. J., & Antonucci, T. C. (2015). The complex nature of family  
303 support across the life span: Implications for psychological well-being. *Developmental*  
304 *psychology*, 51(3), 277.
- 305 Gerstorf, D., Ram, N., Mayraz, G., Hidajat, M., Lindenberger, U., Wagner, G. G., & Schupp, J.  
306 (2010). Late-life decline in well-being across adulthood in Germany, the United

- 307 Kingdom, and the United States: Something is seriously wrong at the end of life.  
308 *Psychology and aging*, 25(2), 477.
- 309 González, M., Díez, M., Morgado, B., Angulo, A., & López-Gaviño, F. (2023). Lesbian and  
310 heterosexual Spanish and Swedish couples: Division of labor and life-satisfaction.  
311 *Journal of Marriage and Family*, 85(5), 1047-1066.
- 312 Gotelli, N. J., & Ellison, A. M. (2004). *A primer of ecological statistics* (Vol. 1, pp. 1-640).  
313 Sunderland: Sinauer Associates.
- 314 Harrison, E. K., Quick, A., Abdallah, S., Ruggeri, K., Garcia Garzon, G., Maguire, Á., Huppert,  
315 F. A., Saini, R. & Zwiener, N. (2016). Looking into the Wellbeing Kaleidoscope: Results  
316 from the European Social Survey. London: New Economics Foundation.
- 317 Hayward, R. D., & Elliott, M. (2014). Cross-national analysis of the influence of cultural norms  
318 and government restrictions on the relationship between religion and well-being. *Review*  
319 *of Religious Research*, 56(1), 23-43.
- 320 Helliwell, J. F., Layard, R., Sachs, J. D., De Neve, J.-E., Aknin, L. B., & Wang, S. (Eds.).  
321 (2024). World Happiness Report 2024. University of Oxford: Wellbeing Research Centre
- 322 Huppert, F. A., & So, T. T. (2013). Flourishing across Europe: Application of a new conceptual  
323 framework for defining well-being. *Social indicators research*, 110, 837-861.
- 324 Jackson, S. B., Stevenson, K. T., Larson, L. R., Peterson, M. N., & Seekamp, E. (2021). Outdoor  
325 Activity Participation Improves Adolescents' Mental Health and Well-Being during the  
326 COVID-19 Pandemic. *International Journal of Environmental Research and Public*  
327 *Health*, 18(5), Article 5. <https://doi.org/10.3390/ijerph18052506>
- 328 Jenkins, D. G., & Quintana-Ascencio, P. F. (2020). A solution to minimum sample size for  
329 regressions. *PloS one*, 15(2), e0229345.

- 330 Kim, A. C. H., Newman, J. I., & Kwon, W. (2020). Developing community structure on the  
331 sidelines: A social network analysis of youth sport league parents. *The Social Science*  
332 *Journal*, 57(2), 178-194.
- 333 La Guardia, J. G., & Patrick, H. (2008). Self-determination theory as a fundamental theory of  
334 close relationships. *Canadian Psychology/Psychologie canadienne*, 49(3), 201.
- 335 Lee, C. F., & Tang, S. M. (2022). What type of housework happiness do you prefer? Does  
336 gender and health matter? A Taiwanese study. *International Journal of Environmental*  
337 *Research and Public Health*, 19(14), 8409.
- 338 Leopold, T. (2019). Diverging trends in satisfaction with housework: Declines in women,  
339 increases in men. *J. Marriage Fam*, 81: 133-144. <https://doi.org/10.1111/jomf.12520>
- 340 Lim, C., & Putnam, R. D. (2010). Religion, social networks, and life satisfaction. *American*  
341 *Sociological Review*, 75(6), 914–933
- 342 Liverpool, S., Moinuddin, M., Aithal, S., Owen, M., Bracegirdle, K., Caravotta, M., Walker, R.,  
343 Murphy, C., Karkou, V. (2023). Mental health and wellbeing of further and higher  
344 education students returning to face-to-face learning after Covid-19 restrictions. *PLOS*  
345 *ONE*, 18, e0280689. <https://doi.org/10.1371/journal.pone.0280689>
- 346 Miles, J., & Shevlin, M. (2001). *Applying regression and correlation: A guide for students and*  
347 *researchers*. Sage.
- 348 Myers, S. S., & Patz, J. A. (2009). Emerging threats to human health from global environmental  
349 change. *Annual review of environment and resources*, 34, 223-252.
- 350 Newman, D. B., Tay, L., & Diener, E. (2014). Leisure and subjective well-being: A model of  
351 psychological mechanisms as mediating factors. *Journal of Happiness Studies*, 15, 555-  
352 578.



- 353 Offer, S. (2014). Time with children and employed parents' emotional well-being. *Social science*  
354 *research, 47*, 192-203.
- 355 Offer, S. (2013). Family time activities and adolescents' emotional well-being. *Journal of*  
356 *Marriage and Family, 75*(1), 26-41.
- 357 Oishi, S., Diener, E., & Lucas, R. E. (2007). The optimum level of well-being: Can people be too  
358 happy?. *Perspectives on psychological science, 2*(4), 346-360.
- 359 Owoo, N. S., & Lambon-Quayefio, M. P. (2021). Mixed methods exploration of Ghanaian  
360 women's domestic work, childcare and effects on their mental health. *PLoS One, 16*(2),  
361 e0245059.
- 362 Pagan, R. (2020). Sport participation, life satisfaction and domains of satisfaction among people  
363 with disabilities. *Applied Research in Quality of Life, 15*, 893-911.
- 364 Peristera, P., Westerlund, H., & Hanson, L. L. M. (2018). Paid and unpaid working hours among  
365 Swedish men and women in relation to depressive symptom trajectories: results from four  
366 waves of the Swedish longitudinal occupational survey of health. *BMJ open, 8*(6),  
367 e017525.
- 368 Peterson, M. N., Larson, L. R., Hipp, A., Beall, J. M., Lerose, C., Desrochers, H., ... & Martin,  
369 K. L. (2024). Birdwatching linked to increased psychological well-being on college  
370 campuses: a pilot-scale experimental study. *Journal of Environmental Psychology,*  
371 102306.
- 372 Ross, C. E., & Mirowsky, J. (1992). Households, employment, and the sense of control. *Social*  
373 *Psychology Quarterly, 217-235.*

- 374 Ruggeri, K., Garcia-Garzon, E., Maguire, Á., Matz, S., & Huppert, F. A. (2020). Well-being is  
375 more than happiness and life satisfaction: a multidimensional analysis of 21 countries.  
376 *Health and quality of life outcomes*, 18, 1-16.
- 377 Schmiedeberg, C., & Schröder, J. (2017). Leisure activities and life satisfaction: An analysis  
378 with German panel data. *Applied Research in Quality of Life*, 12, 137-151.
- 379 Sheldon, E., Simmonds-Buckley, M., Bone, C., Mascarenhas, T., Chan, N., Wincott, M., ... &  
380 Barkham, M. (2021). Prevalence and risk factors for mental health problems in university  
381 undergraduate students: A systematic review with meta-analysis. *Journal of Affective*  
382 *Disorders*, 287, 282-292.
- 383 Sholihin, M., Hardivizon, H., Wanto, D., & Saputra, H. (2022). The effect of religiosity on life  
384 satisfaction: A meta-analysis. *HTS Teologiese Studies/Theological Studies*, 78(4), 7172.
- 385 Stevenson, B., & Wolfers, J. (2009). The paradox of declining female happiness. *American*  
386 *Economic Journal: Economic Policy*, 1(2), 190-225.
- 387 Taris, T. W., & Schaufeli, W. B. (2018). Individual well-being and performance at work: A  
388 conceptual and theoretical overview. *Current issues in work and organizational*  
389 *psychology*, 189-204.
- 390 Tomanovic, S. (2003). Negotiating children's participation and autonomy within families.  
391 *International Journal Of Childrens Rights*, 11(1), 51-71.
- 392 Veenhoven, R. (1996). The study of life-satisfaction. Eötvös University Press. Retrieved from  
393 <http://hdl.handle.net/1765/16311>....Chapter 1 in: Saris, W.E., Veenhoven, R.,  
394 Scherpenzeel, A.C. & Bunting B. (eds) 'A comparative study of satisfaction with life in  
395 Europe. Eötvös University Press, 1996, ISBN963 463 081 2, pp. 11-48

396 **Table 1.** Exploratory factor analysis for Satisfaction with Life scale items and overall  
397 Satisfaction with Life scale score among participants ( $N = 92$ ).

398

| <b>Item</b>                                                 | <b>Mean (SD)</b>    | <b>factor loadings</b> |
|-------------------------------------------------------------|---------------------|------------------------|
| <b>Satisfaction with Life scale score</b>                   | <b>24.83 (5.98)</b> |                        |
| In most ways my life is close to my ideal                   | 4.92 (1.51)         | 0.87                   |
| The conditions of my life are excellent                     | 4.98 (1.55)         | 0.84                   |
| I am satisfied with my life                                 | 5.43 (1.42)         | 0.91                   |
| So far, I have gotten the important things I want in life   | 5.55 (1.33)         | 0.57                   |
| If I could live my life over, I would change almost nothing | 4.16 (1.66)         | 0.47                   |
| Eigenvalue                                                  |                     | 3.19                   |
| % of variance explained                                     |                     | 57.06                  |
| Cronbach's alpha                                            |                     | 0.85                   |

399

400 **Table 2.** Ordinary least squares regression results estimating satisfaction with life among parents  
 401 of college students based on frequency of shared activities with those children when they were  
 402 still living at home, current activity levels among parents, and demographic variables of parents  
 403 (N = 91).

| Parameter                                                                       | Estimate | Std. Error | P            | Std. Beta | Partial Eta squared | LSN 0.05     |
|---------------------------------------------------------------------------------|----------|------------|--------------|-----------|---------------------|--------------|
| Intercept                                                                       | 14.783   | 4.980      | 0.004        |           |                     | 42.768       |
| Frequency of shared activities with children (up to and including 17 years old) |          |            |              |           |                     |              |
| Work on household tasks                                                         | 1.6117   | 0.539      | <b>0.004</b> | 0.276     | 0.0995              | 42.144       |
| Play sports outside with my children                                            | -1.049   | 0.508      | <b>0.042</b> | -0.188    | 0.042               | 84.748       |
| Participate in religious activities                                             | 0.650    | 0.317      | <b>0.043</b> | 0.174     | 0.0495              | 85.583       |
| Visit local parks                                                               | 0.708    | 0.532      | 0.187        | 0.129     | 0.0109              | 200.000      |
| Current activity level (walking outside) <sup>a</sup>                           | 0.815    | 0.238      | <b>0.001</b> | 0.299     | 0.127               | 33.1155<br>3 |
| Household income                                                                | 0.863    | 0.332      | <b>0.011</b> | 0.236     | 0.0768              | 54.7946<br>2 |
| Age                                                                             | -0.139   | 0.078      | 0.078        | -0.153    | 0.0377              | 112.642      |
| Marital status <sup>b</sup>                                                     | -0.894   | 0.806      | 0.271        | -0.105    | 0.015               | 286.490      |
| Gender <sup>c</sup>                                                             | 0.119    | 0.566      | 0.834        | 0.019     | 0.0005              | 7862.54<br>4 |
| <b>Adjusted R<sup>2</sup> = 0.44</b>                                            |          |            |              |           |                     |              |

404 <sup>a</sup> Participants were asked how many days from the last week they had walked at least 10 minutes  
 405 at a time, coded as 1-7.

406 <sup>b</sup> Participants self identifying as married or remarried coded as 1, and those self identifying as  
 407 divorced or widowed coded as 0.

408 <sup>c</sup> Participants self identifying as female coded as 2, those self identifying as male coded as 1, and  
 409 no participants self identified as another category.
